# Supplementary material
Source: PubMed Central journal article supplement (PMC3837210)
Supplement: NIHMS54901-supplement-S1.pdf [file NIHMS54901-supplement-S1.pdf]

# SUPPLEMENTAL MATERIAL

to

## **Combustion chemistry and flame structure of furan group biofuels using molecular-beam mass spectrometry and gas chromatography – Part II: 2-Methylfuran**

Luc-Sy Tran<sup>1</sup>, Casimir Togbé<sup>2</sup>, Dong Liu<sup>2</sup>, Daniel Felsmann<sup>2</sup>, Patrick Oßwald<sup>2#</sup>, Pierre-Alexandre Glaude<sup>1</sup>, René Fournet<sup>1</sup>, Baptiste Sirjean<sup>1</sup>, Frédérique Battin-Leclerc<sup>1\*</sup>, Katharina Kohse-Höinghaus<sup>2\*</sup>

<sup>1</sup> Laboratoire Réactions et Génie des Procédés (LRGP), CNRS, Université de Lorraine, ENSIC, 1 rue Grandville, BP 20451, 54001 Nancy Cedex, France

<sup>2</sup> Department of Chemistry, Bielefeld University, Universitätsstraße 25, D-33615 Bielefeld, Germany

# now at German Aerospace Center (DLR), Institute of Combustion Technology, Pfaffenwaldring 38-40, D-70569 Stuttgart, Germany

\* Corresponding authors. Katharina Kohse-Höinghaus: Email: kkh@uni-bielefeld.de, Phone: +49 521 106 2052, Fax: +49 521 106 6027 and Frédérique Battin-Leclerc: Email: frederique.battin-leclerc@univ-lorraine.fr, Phone: +33 3 83 17 51 25, Fax: +33 3 83 37 81 20

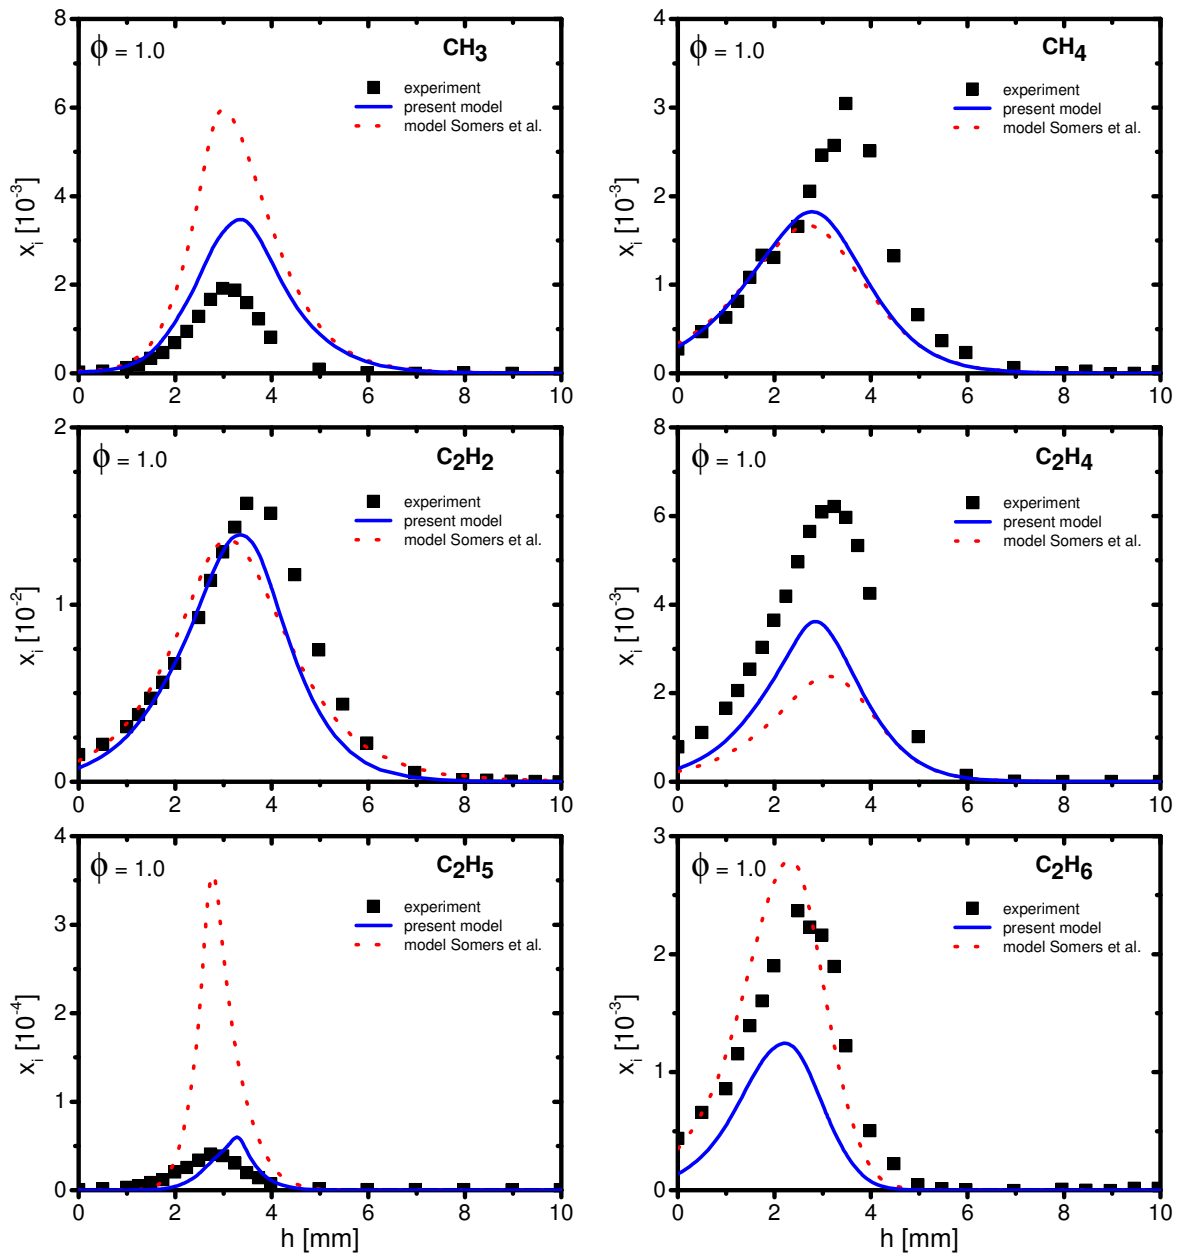

**Figure S1.** Mole fraction profiles of selected  $C_1$  and  $C_2$  species for  $\phi=1.0$ . Symbols: experiment; lines: simulation; solid lines: present model, dotted lines: model of Somers et al. [S1].

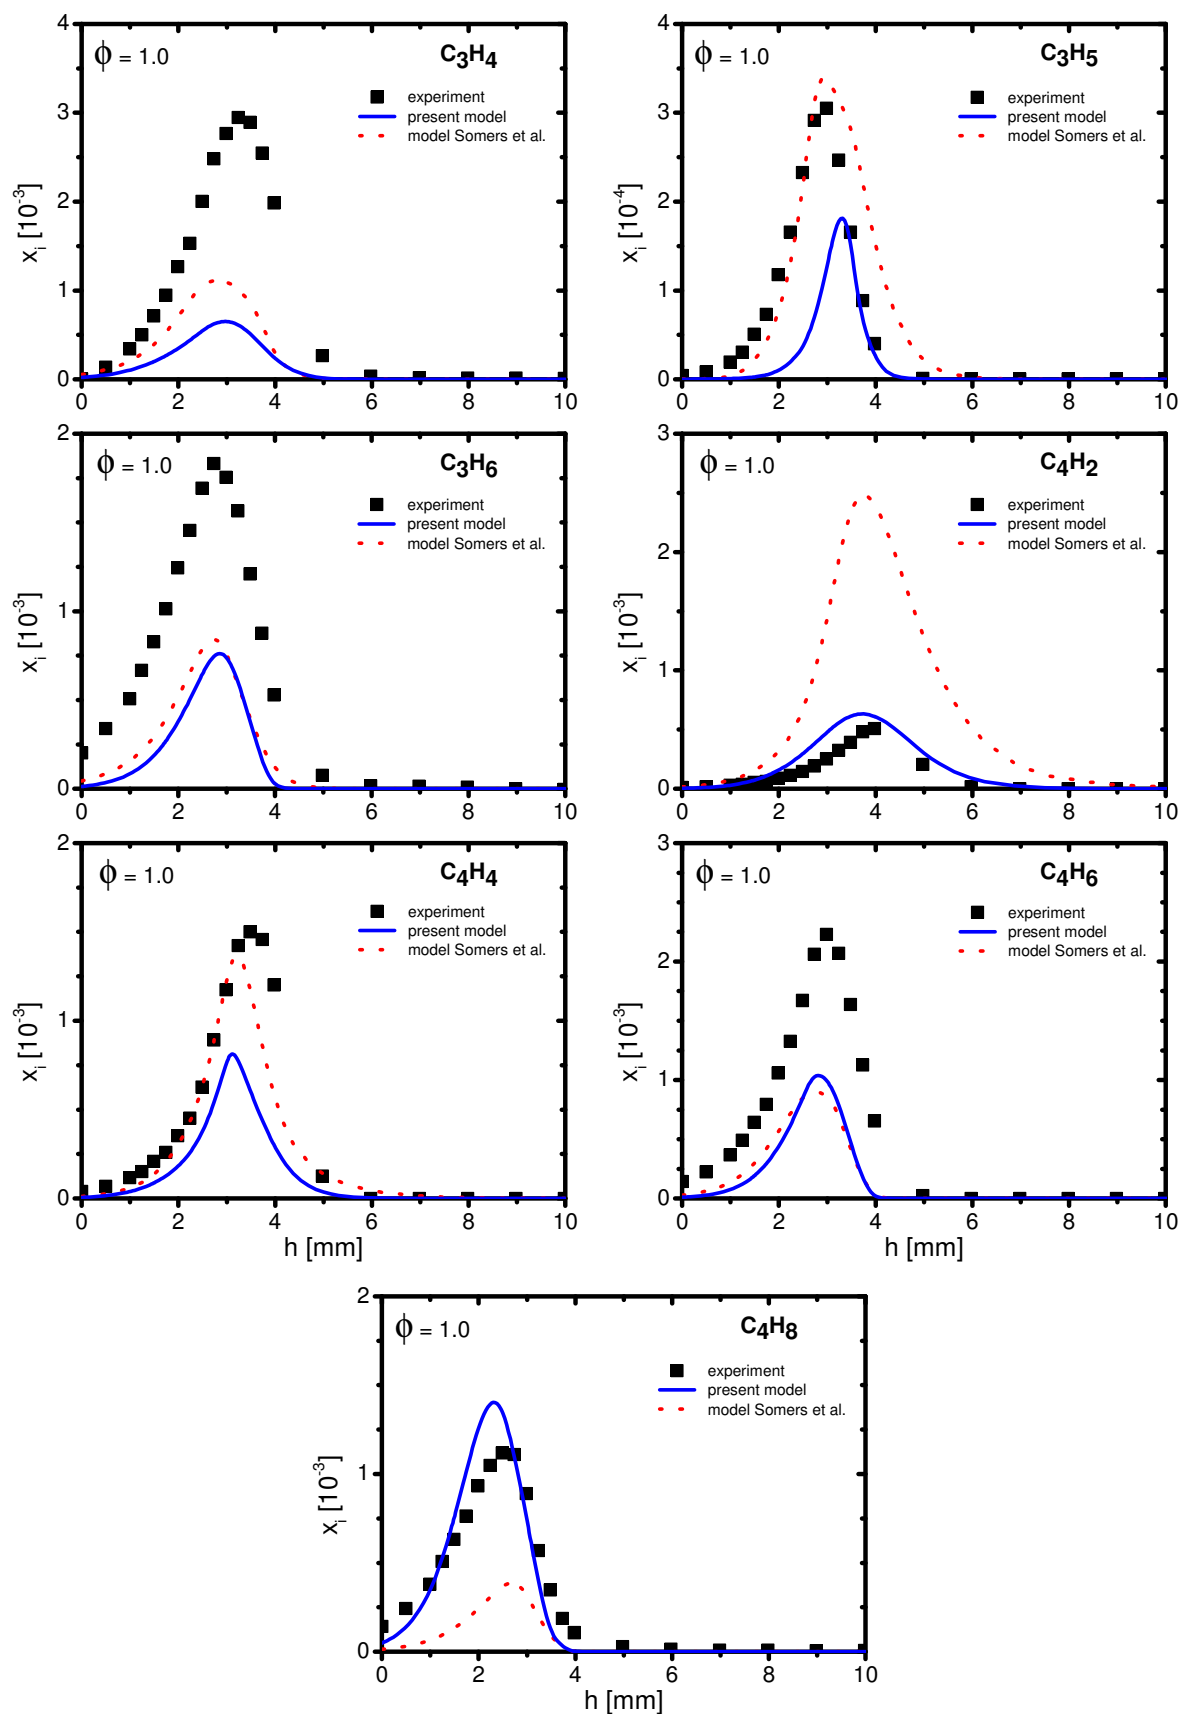

**Figure S2.** Mole fraction profiles of selected C<sub>3</sub> and C<sub>4</sub> species for  $\phi=1.0$ . Symbols: experiment; lines: simulation; solid lines: present model, dotted lines: model of Somers et al. [S1].

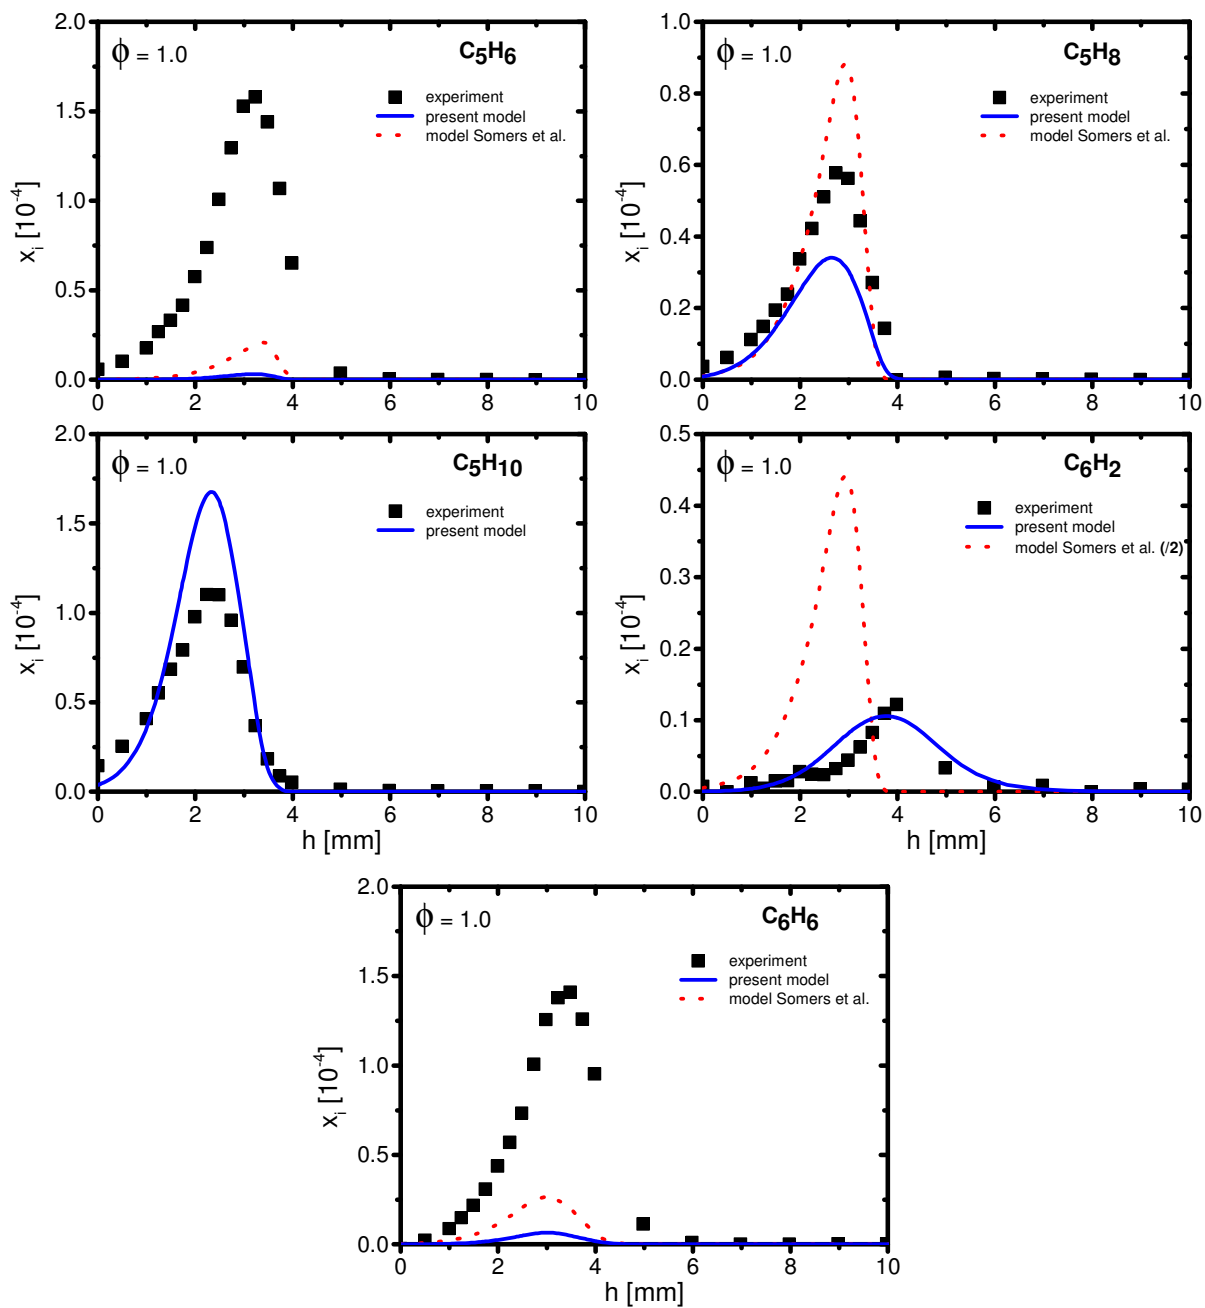

**Figure S3.** Mole fraction profiles of selected  $C_5$  and  $C_6$  species for  $\phi=1.0$ . Symbols: experiment; lines: simulation; solid lines: present model, dotted lines: model of Somers et al. [S1], except for  $C_5H_{10}$  (simulation data were not available).

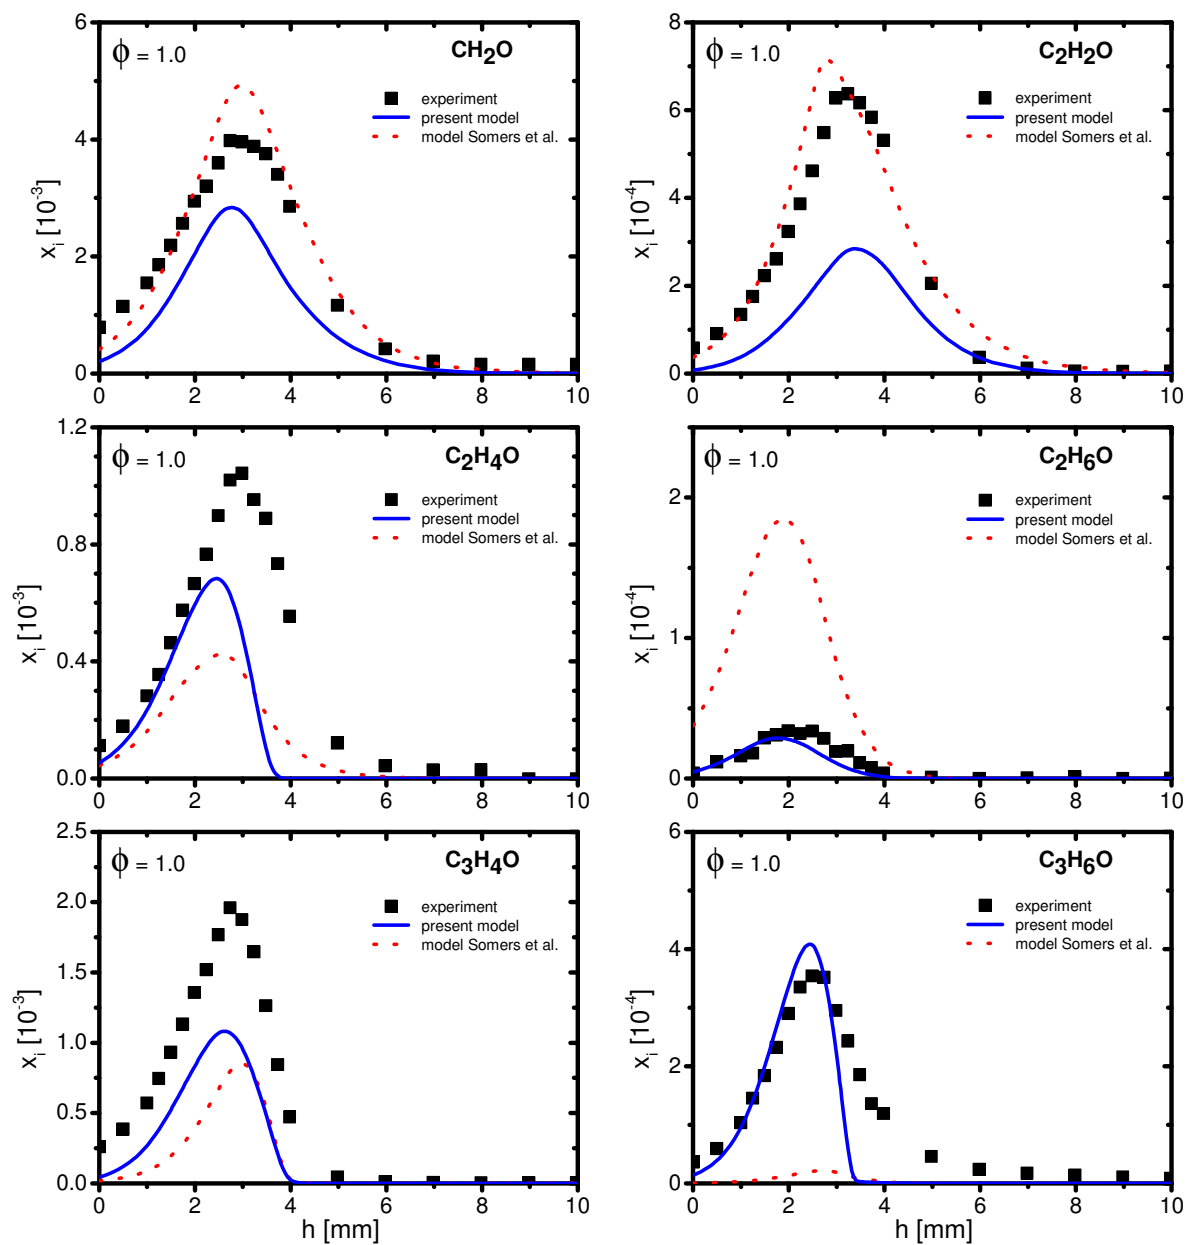

**Figure S4.** Mole fraction profiles of selected  $C_1$ - $C_3$  oxygenated species for  $\phi=1.0$ . Symbols: experiment; lines: simulation; solid lines: present model, dotted lines: model of Somers et al. [S1].

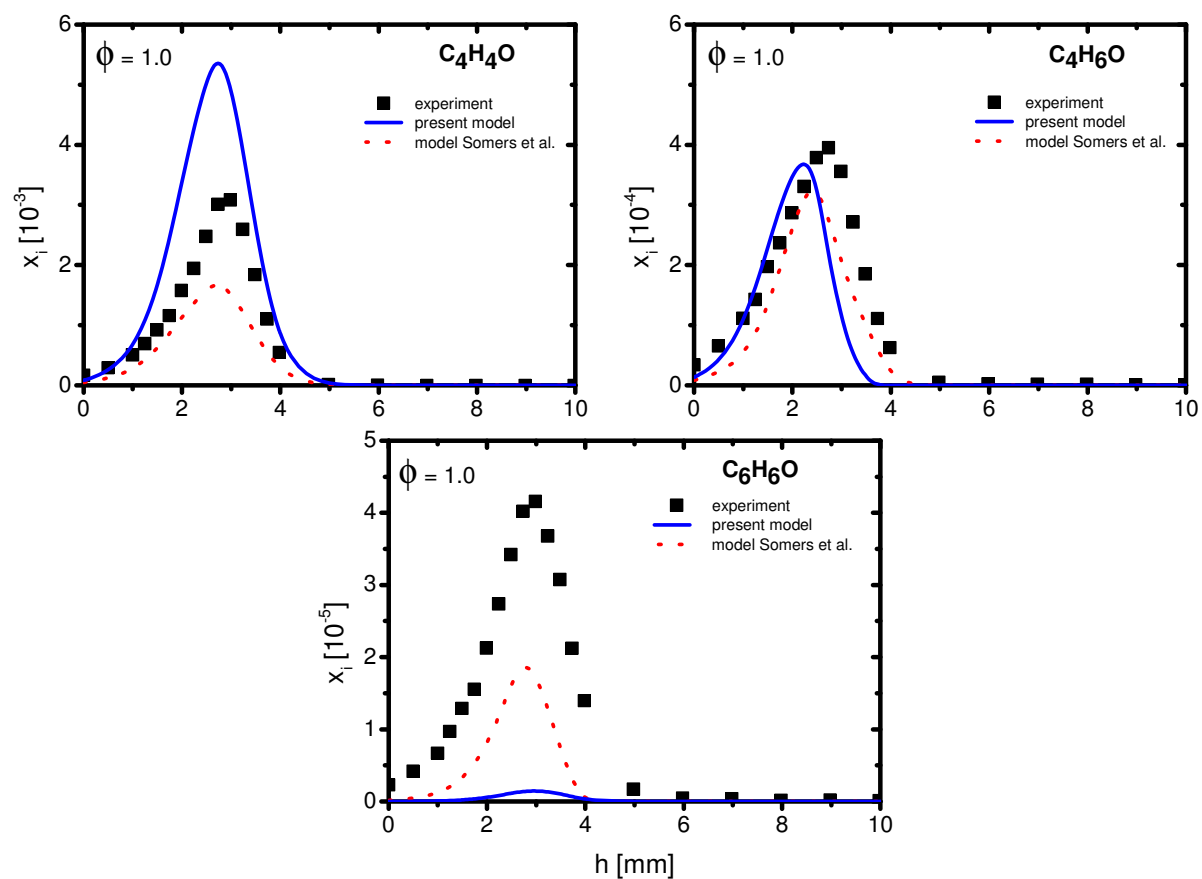

**Figure S5.** Mole fraction profiles of selected C<sub>1</sub>-C<sub>3</sub> oxygenated species for  $\phi=1.0$ . Symbols: experiment; lines: simulation; solid lines: present model, dotted lines: model of Somers et al. [S1].

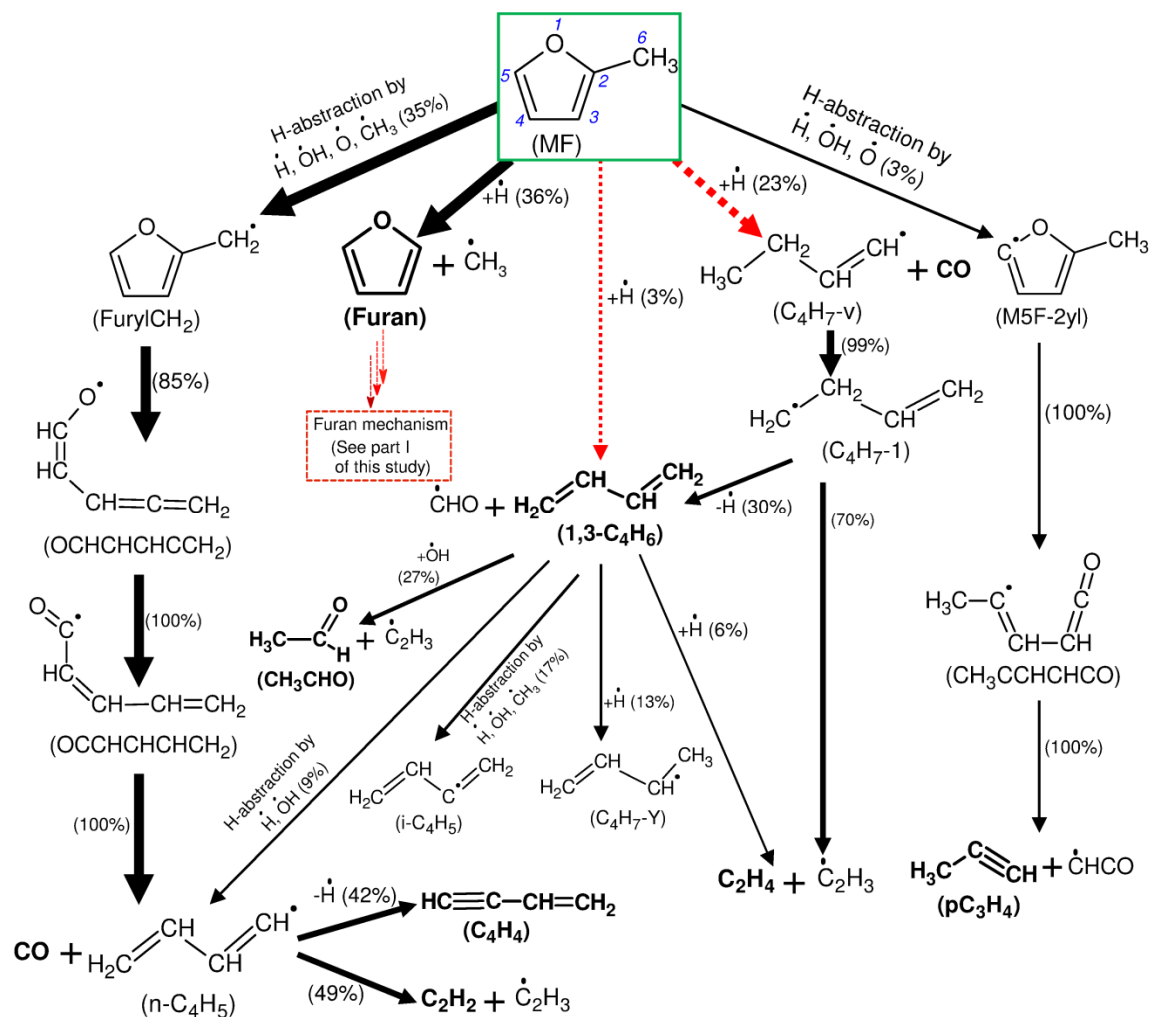

**Figure S6.** Reaction flow analysis for the consumption of MF in the stoichiometric MF flame ( $\phi=1.0$ ) for a distance of 3.0 mm from the burner, corresponding to a simulated temperature of 1210 K and 85% conversion of MF. The size of the arrows is proportional to the relative rates of consumption of a given species. Dashed arrows: reaction pathways which have been added or revised in the present study (see Section 3 in the main paper).

## Reference

- [S1] K.P. Somers, J.M. Simmie, F. Gillespie, U. Burke, J. Connolly, W.K. Metcalfe, F. Battin-Leclerc, P. Dirrenberger, O. Herbinet, P.-A. Glaude, H.J. Curran, Proc. Combust. Inst. 34 (2013) 225–232.
